# Supplementary material for: Compressible and flexible PPy@MoS2/C microwave absorption foam with strong dielectric polarization from 2D semiconductor intermediate sandwich structure
Source: Royal Society of Chemistry journal article supplement (doi:10.1039/d0nr08794g), 2021-01-01
Supplement: d0nr08794g1.pdf [file d0nr08794g1.pdf]

## **Electronic Supplementary Information**

# **Compressible and Flexible PPy@MoS<sub>2</sub>/C Microwave Absorption Foam with Strong Dielectric Polarization from 2D Semiconductor Intermediated Sandwich Structure**

Ziqi Yang, Huiqiao Guo, Wenbin You\*, Zhengchen Wu, Liting Yang, Min Wang\* and Renchao Che\*

Laboratory of Advanced Materials, Department of Materials Science and Collaborative Innovation Center of Chemistry for Energy Materials (iChem), Fudan University, Shanghai 200438, P. R. China.

E-mail : rcche@fudan.edu.cn; minwang@fudan.edu.cn; wbyou@fudan.edu.cn

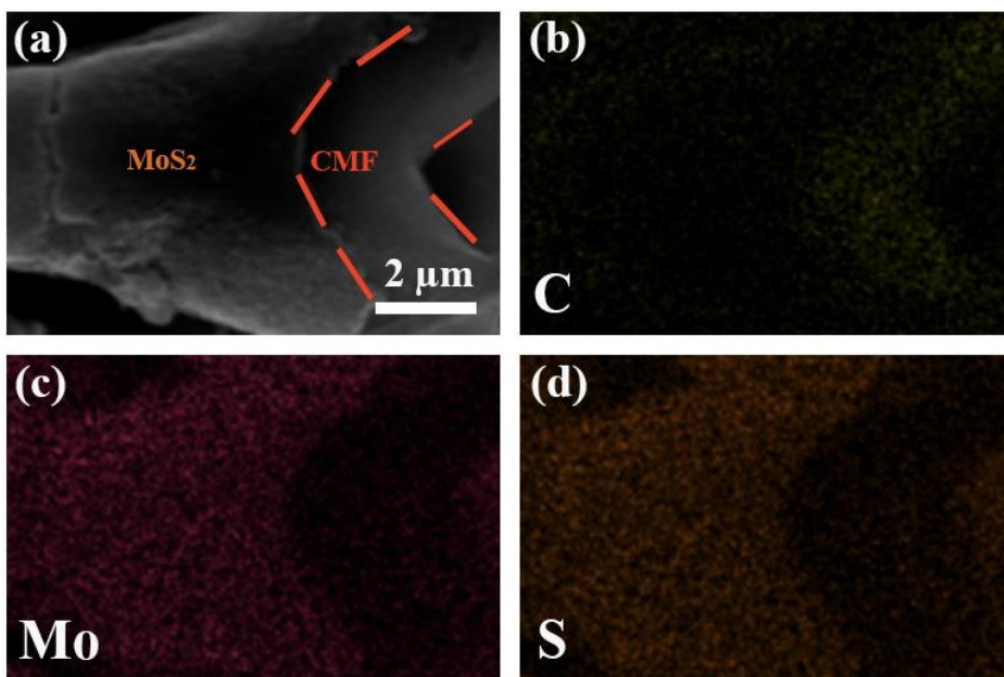

**Fig. S1** SEM images of (a)MoS<sub>2</sub>/CMF and EDS elemental mapping profiles of corresponding (b) carbon, (c) molybdenum, and (d) sulfur, respectively.

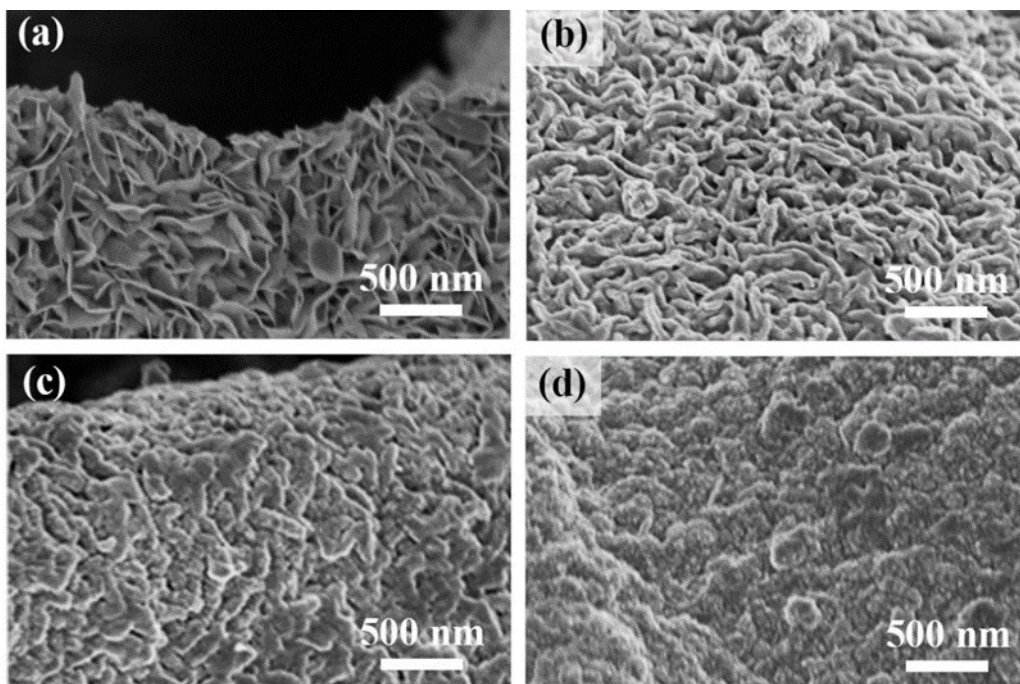

**Fig. S2** SEM images of the PPy polymerization time of PPy@MoS<sub>2</sub>/CMF composites (a) 0 h, (b) 1 h, (c) 2 h, and (d) 4 h, respectively.

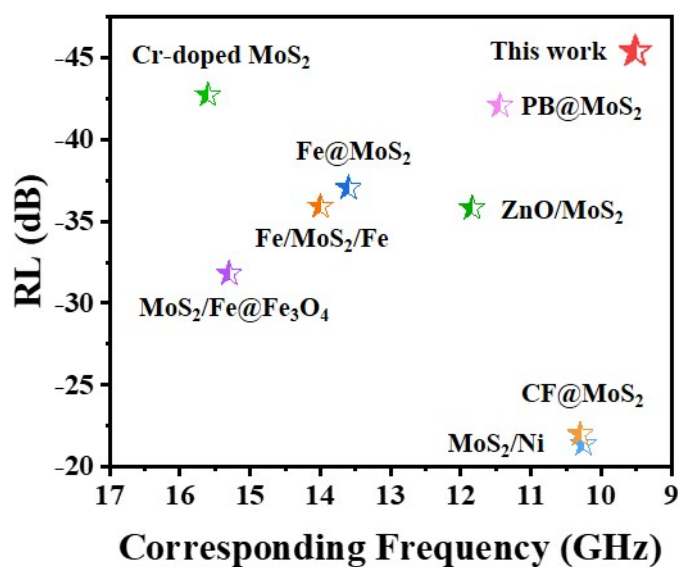

**Fig. S3** The maximum reflection loss values and corresponding frequency of the sample PPy@MoS<sub>2</sub>/CMF-2 and related materials<sup>1-8</sup>.

### Supplementary references

- 1 Y. Liu, C. Ji, X. Su, X. He, J. Xu and Y. Li, *J. Magn. Magn. Mater.*, 2020, **511**, 166961.
- 2 P. Wang, G. Wang, J. Zhang, B. Duan, L. Zheng, S. Zhang, D. He and T. Wang, *Chem. Eng. J.*, 2020, **382**, 122804.
- 3 R. Zhang, Y. Du, G. Han and X. Gao, *J. Mater. Sci.*, 2019, **54**, 552-559.
- 4 Z. Zhao, S. Xu, Z. Du, C. Jiang and X. Huang, *ACS Sustain. Chem. Eng.*, 2019, **7**, 7183-7192.
- 5 J. Pan, X. Sun, T. Wang, Z. Zhu, Y. He, W. Xia and J. He, *Appl. Surf. Sci.*, 2018, **457**, 271-279.
- 6 J. Luo, K. Zhang, M. Cheng, M. Gu and X. Sun, *Chem. Eng. J.*, 2020, **380**, 122625.
- 7 W. Zhang, X. Zhang, Q. Zhu, Y. Zheng, L. Liotta and H. Wu, *J. Colloid Interface Sci.*, 2021, **586**, 457-468.
- 8 P. Wang, J. Zhang, G. Wang, B. Duan, D. He, T. Wang and F. Li, *J. Mater. Sci. Technol.*, 2019, **35**, 1931-1939.
